# Supplementary material for: Using ancestral information to detect and localize quantitative trait loci in genome-wide association studies
Source: Springer Nature journal article supplement (doi:10.1186/1471-2105-14-200), 2013-06-20

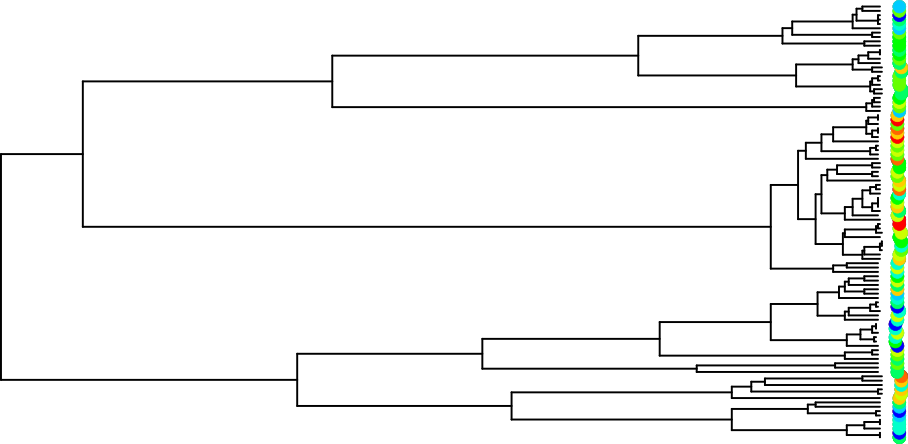

Supplement: 12859_2013_6851_MOESM1_ESM.pdf [file 12859_2013_6851_MOESM1_ESM.pdf]
