# Supplementary material for: Using ancestral information to detect and localize quantitative trait loci in genome-wide association studies
Source: Springer Nature journal article supplement (doi:10.1186/1471-2105-14-200), 2013-06-20
Supplement: 12859_2013_6851_MOESM2_ESM.pdf [file 12859_2013_6851_MOESM2_ESM.pdf]

**a**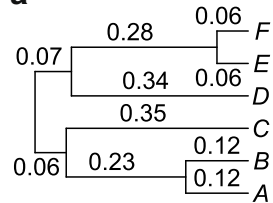

$$\begin{pmatrix} & A & B & C & D & E & F \\ A & 0.41 & 0.29 & 0.06 & 0.00 & 0.00 & 0.00 \\ B & 0.29 & 0.41 & 0.06 & 0.00 & 0.00 & 0.00 \\ C & 0.06 & 0.06 & 0.41 & 0.00 & 0.00 & 0.00 \\ D & 0.00 & 0.00 & 0.00 & 0.41 & 0.07 & 0.07 \\ E & 0.00 & 0.00 & 0.00 & 0.07 & 0.41 & 0.35 \\ F & 0.00 & 0.00 & 0.00 & 0.07 & 0.35 & 0.41 \end{pmatrix}$$
**b**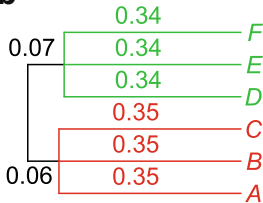

$$\begin{pmatrix} & A & B & C & D & E & F \\ A & 0.41 & 0.06 & 0.06 & 0.00 & 0.00 & 0.00 \\ B & 0.06 & 0.41 & 0.06 & 0.00 & 0.00 & 0.00 \\ C & 0.06 & 0.06 & 0.41 & 0.00 & 0.00 & 0.00 \\ D & 0.00 & 0.00 & 0.00 & 0.41 & 0.07 & 0.07 \\ E & 0.00 & 0.00 & 0.00 & 0.07 & 0.41 & 0.07 \\ F & 0.00 & 0.00 & 0.00 & 0.07 & 0.07 & 0.41 \end{pmatrix}$$
**c**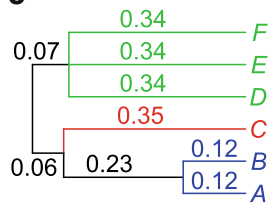

$$\begin{pmatrix} & A & B & C & D & E & F \\ A & 0.41 & 0.29 & 0.06 & 0.00 & 0.00 & 0.00 \\ B & 0.29 & 0.41 & 0.06 & 0.00 & 0.00 & 0.00 \\ C & 0.06 & 0.06 & 0.41 & 0.00 & 0.00 & 0.00 \\ D & 0.00 & 0.00 & 0.00 & 0.41 & 0.07 & 0.07 \\ E & 0.00 & 0.00 & 0.00 & 0.07 & 0.41 & 0.07 \\ F & 0.00 & 0.00 & 0.00 & 0.07 & 0.07 & 0.41 \end{pmatrix}$$
